# Supplementary material for: Immune Imprinting Drives Human Norovirus Potential for Global Spread
Source: PubMed Central journal article supplement (PMC9600701; doi:10.1128/mbio.01861-22), 2022-09-14

Root-to-tip GII.4 Capsid

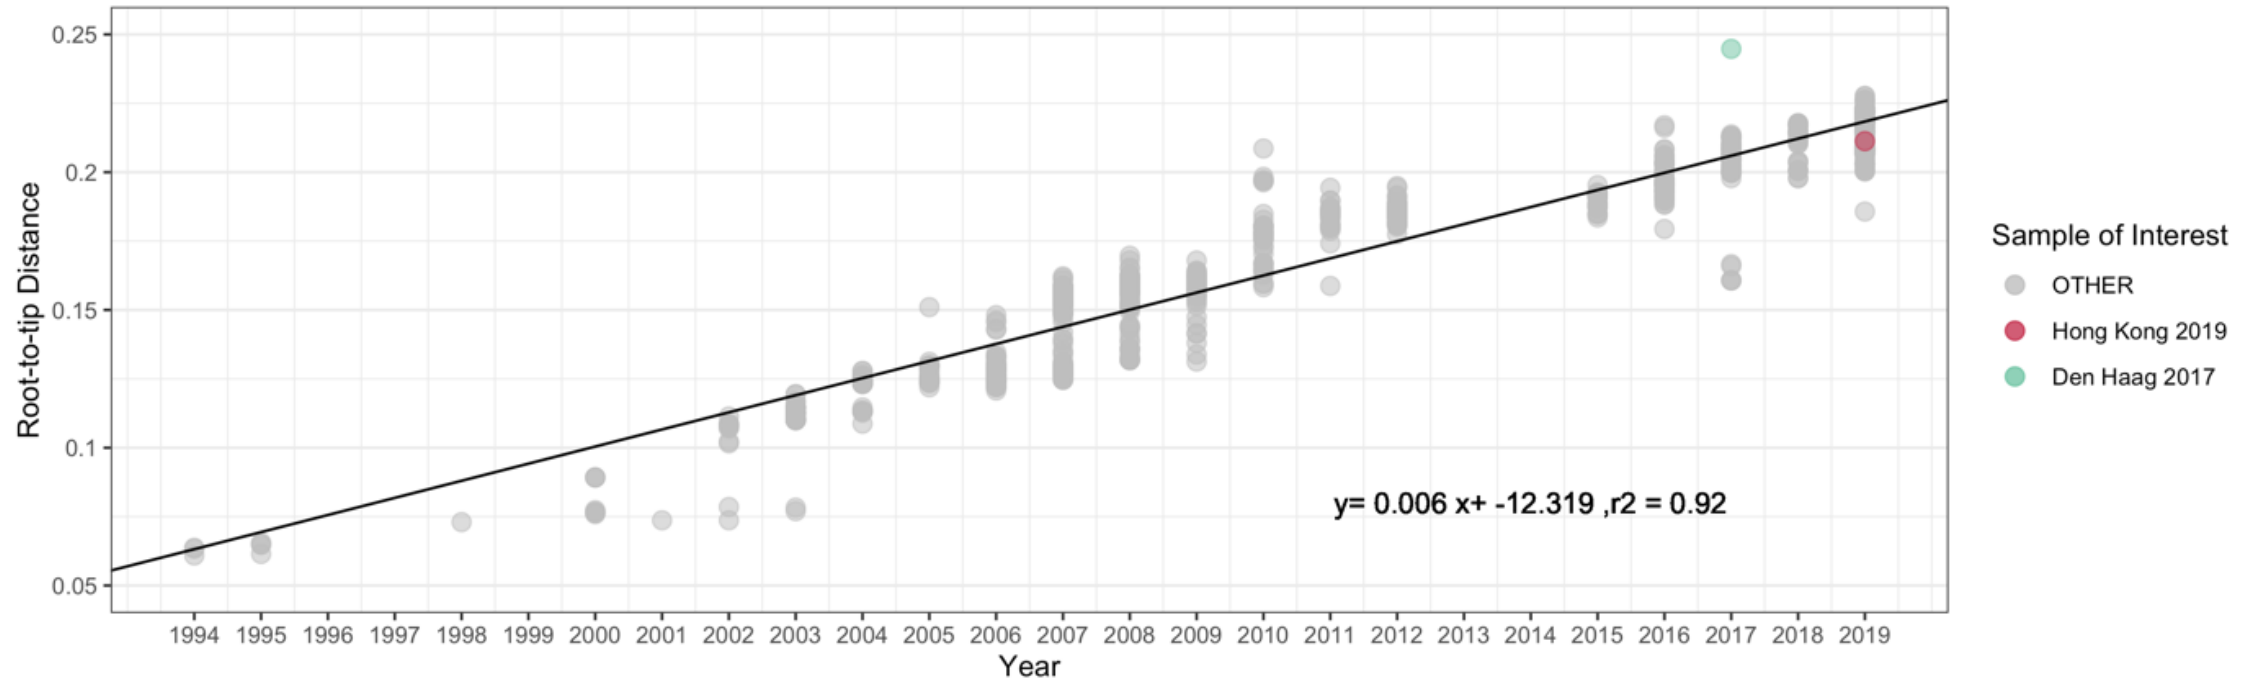

Supplement: mbio.01861-22-s0002.pdf [file mbio.01861-22-s0002.pdf]
