# Supplementary material for: Immune Imprinting Drives Human Norovirus Potential for Global Spread
Source: PubMed Central journal article supplement (PMC9600701; doi:10.1128/mbio.01861-22), 2022-09-14
Supplement: mbio.01861-22-s0005.pdf [file mbio.01861-22-s0005.pdf]

**A.**

|               |                                                                                                       |     |     |     |     |     |     |     |     |     |     |
|---------------|-------------------------------------------------------------------------------------------------------|-----|-----|-----|-----|-----|-----|-----|-----|-----|-----|
|               | 10                                                                                                    | 20  | 30  | 40  | 50  | 60  | 70  | 80  | 90  | 100 |     |
| Consensus     | MKMASNDANPSDGSAAANLVPEVNNNEVMALEFVVGAAIAAPVAGQQNVDPWIRNNFVQAPGGEFTVSPRNAPGEILWSAPLGPDLNPLYSLHARMYNGYA |     |     |     |     |     |     |     |     |     | 100 |
| Den Haag 2006 | MKMASNDANPSDGSAAANLVPEVNNNEVMALEFVVGAAIAAPVAGQQNVDPWIRNNFVQAPGGEFTVSPRNAPGEILWSAPLGPDLNPLYSLHARMYNGYA |     |     |     |     |     |     |     |     |     | 100 |
| Den Haag 2017 | MKMASNDANPSDGSAAANLVPEVNNNEVMALEFVVGAAIAAPVAGQQNVDPWIRNNFVQAPGGEFTVSPRNAPGEILWSAPLGPDLNPLYSLHARMYNGYA |     |     |     |     |     |     |     |     |     | 100 |
|               | 110                                                                                                   | 120 | 130 | 140 | 150 | 160 | 170 | 180 | 190 | 200 |     |
| Consensus     | GGFEVQVILAGNAFTAGKIIFAAVPPNFPTTEGLSPSQVIMFPHIIVDVRQLEPVLIPLPDRNNFYHYNQSNDSITIKLIAMLYTPLRANNAGDDVFTVSC |     |     |     |     |     |     |     |     |     | 200 |
| Den Haag 2006 | GGFEVQVILAGNAFTAGKIIFAAVPPNFPTTEGLSPSQVIMFPHIIVDVRQLEPVLIPLPDRNNFYHYNQSNDSITIKLIAMLYTPLRANNAGDDVFTVSC |     |     |     |     |     |     |     |     |     | 200 |
| Den Haag 2017 | GGFEVQVILAGNAFTAGKIIFAAVPPNFPTTEGLSPSQVIMFPHIIVDVRQLEPVLIPLPDRNNFYHYNQSNDSITIKLIAMLYTPLRANNAGDDVFTVSC |     |     |     |     |     |     |     |     |     | 200 |
|               | 210                                                                                                   | 220 | 230 | 240 | 250 | 260 | 270 | 280 | 290 | 300 |     |
| Consensus     | RVLTRPSPDFDFIFLVPPTVESRTKPFVPIILVEEMNSRFFIPELKLFTGPSXAFVVPQNGRCTTDGVLGGTQLSPVNICTFRGDVXHIAGSRNYT      |     |     |     |     |     |     |     |     |     | 300 |
| Den Haag 2006 | RVLTRPSPDFDFIFLVPPTVESRTKPFVPIILVEEMNSRFFIPELKLFTGPSXAFVVPQNGRCTTDGVLGGTQLSPVNICTFRGDVXHIAGSRNYT      |     |     |     |     |     |     |     |     |     | 300 |
| Den Haag 2017 | RVLTRPSPDFDFIFLVPPTVESRTKPFVPIILVEEMNSRFFIPELKLFTGPSXAFVVPQNGRCTTDGVLGGTQLSPVNICTFRGDVXHIAGSRNYT      |     |     |     |     |     |     |     |     |     | 300 |
|               | 310                                                                                                   | 320 | 330 | 340 | 350 | 360 | 370 | 380 | 390 | 400 |     |
| Consensus     | MNLASLNWNNYDPTTEIIPAPLGTDFVVGKIQQGLTQTTXDGSTRGHKATVYTGSAFTPKLGSVQXXTDENDFEXXQNKFTPKGVIQDGGTTHRNEP     |     |     |     |     |     |     |     |     |     | 400 |
| Den Haag 2006 | MNLASLNWNNYDPTTEIIPAPLGTDFVVGKIQQGLTQTTXDGSTRGHKATVYTGSAFTPKLGSVQXXTDENDFEXXQNKFTPKGVIQDGGTTHRNEP     |     |     |     |     |     |     |     |     |     | 400 |
| Den Haag 2017 | MNLASLNWNNYDPTTEIIPAPLGTDFVVGKIQQGLTQTTXDGSTRGHKATVYTGSAFTPKLGSVQLATDENDFEXXQNKFTPKGVIQDGGTTHRNEP     |     |     |     |     |     |     |     |     |     | 400 |
|               | 410                                                                                                   | 420 | 430 | 440 | 450 | 460 | 470 | 480 | 490 | 500 |     |
| Consensus     | QQWVLPSPYSGRNHNVHLAPAVAPYFPGEQLLFFRSTMPGCSGYPNDDCLLPQEWVQHFYQEAAPQSDVALLRFVNPDTGRVLFECKLHKSGYVTVA     |     |     |     |     |     |     |     |     |     | 500 |
| Den Haag 2006 | QQWVLPSPYSGRNHNVHLAPAVAPYFPGEQLLFFRSTMPGCSGYPNDDCLLPQEWVQHFYQEAAPQSDVALLRFVNPDTGRVLFECKLHKSGYVTVA     |     |     |     |     |     |     |     |     |     | 500 |
| Den Haag 2017 | QQWVLPSPYSGRNHNVHLAPAVAPYFPGEQLLFFRSTMPGCSGYPNDDCLLPQEWVQHFYQEAAPQSDVALLRFVNPDTGRVLFECKLHKSGYVTVA     |     |     |     |     |     |     |     |     |     | 500 |
|               | 510                                                                                                   | 520 | 530 | 540 |     |     |     |     |     |     |     |
| Consensus     | HTGQHDLVIPPNGYFRFDSWVNQFYTLAPMGNGTGRRRAL*                                                             |     |     |     |     |     |     |     |     |     | 541 |
| Den Haag 2006 | HTGQHDLVIPPNGYFRFDSWVNQFYTLAPMGNGTGRRRAL*                                                             |     |     |     |     |     |     |     |     |     | 541 |
| Den Haag 2017 | HTGQHDLVIPPNGYFRFDSWVNQFYTLAPMGNGTGRRRAL*                                                             |     |     |     |     |     |     |     |     |     | 541 |

**B.**

|                |                                                                                                          |     |     |     |     |     |     |     |     |     |     |
|----------------|----------------------------------------------------------------------------------------------------------|-----|-----|-----|-----|-----|-----|-----|-----|-----|-----|
|                | 10                                                                                                       | 20  | 30  | 40  | 50  | 60  | 70  | 80  | 90  | 100 |     |
| Consensus      | MKMASNDANPSDGSANLVPEVNNNEVMALEFVVGAAIAAPVAGQQNVDPWIRNNFVQAPGGEFTVSPRNAPGEILWSAPLGPDLNPLYSLHARMYNGYA      |     |     |     |     |     |     |     |     |     | 100 |
| Hong Kong 2019 | MKMASNDANPSDGSANLVPEVNNNEVMALEFVVGAAIAAPVAGQQNVDPWIRNNFVQAPGGEFTVSPRNAPGEILWSAPLGPDLNPLYSLHARMYNGYA      |     |     |     |     |     |     |     |     |     | 100 |
| Armidale 2008  | MKMASNDANPSDGSANLVPEVNNNEVMALEFVVGAAIAAPVAGQQNVDPWIRNNFVQAPGGEFTVSPRNAPGEILWSAPLGPDLNPLYSLHARMYNGYA      |     |     |     |     |     |     |     |     |     | 100 |
|                | 110                                                                                                      | 120 | 130 | 140 | 150 | 160 | 170 | 180 | 190 | 200 |     |
| Consensus      | GGFEVQVILAGNAFTAGKIIFAAVPPNFPTTEGLSPSQVIMFPHIIVDVRQLEPVLIPLPDRNNFYHYNQSNDSITIKLIAMLYTPLRANNAGDDVFTVSC    |     |     |     |     |     |     |     |     |     | 200 |
| Hong Kong 2019 | GGFEVQVILAGNAFTAGKIIFAAVPPNFPTTEGLSPSQVIMFPHIIVDVRQLEPVLIPLPDRNNFYHYNQSNDSITIKLIAMLYTPLRANNAGDDVFTVSC    |     |     |     |     |     |     |     |     |     | 200 |
| Armidale 2008  | GGFEVQVILAGNAFTAGKIIFAAVPPNFPTTEGLSPSQVIMFPHIIVDVRQLEPVLIPLPDRNNFYHYNQSNDSITIKLIAMLYTPLRANNAGDDVFTVSC    |     |     |     |     |     |     |     |     |     | 200 |
|                | 210                                                                                                      | 220 | 230 | 240 | 250 | 260 | 270 | 280 | 290 | 300 |     |
| Consensus      | RVLTRPSPDFDFIFLVPPTVESRTKPFVPIILVEEMNSRFFIPELXLYTGPSXAFVVPQNGRCTTDGVLGGTQLSAVNICTFRGDXTHIAGXRXXT         |     |     |     |     |     |     |     |     |     | 300 |
| Hong Kong 2019 | RVLTRPSPDFDFIFLVPPTVESRTKPFVPIILVEEMNSRFFIPELXLYTGPSXAFVVPQNGRCTTDGVLGGTQLSAVNICTFRGDXTHIAGXRXXT         |     |     |     |     |     |     |     |     |     | 300 |
| Armidale 2008  | RVLTRPSPDFDFIFLVPPTVESRTKPFVPIILVEEMNSRFFIPELRYLYTGPSXAFVVPQNGRCTTDGVLGGTQLSAVNICTFRGDXTHIAGXRXXT        |     |     |     |     |     |     |     |     |     | 300 |
|                | 310                                                                                                      | 320 | 330 | 340 | 350 | 360 | 370 | 380 | 390 | 400 |     |
| Consensus      | MKLASXNWNNDYDPTTEIIPAPLGTDFVVGKIQQGLTQTTXDGSTRGHKAVYTGSAADFAFKGXXXFTDXTDXBDXZSGXNFKFTPKGVXQDGGXXXHXEFP   |     |     |     |     |     |     |     |     |     | 400 |
| Hong Kong 2019 | MKLASXNWNNDYDPTTEIIPAPLGTDFVVGKIQQGLTQTTXDGSTRGHKAVYTGSAADFAFKGXXXFTDXTDXBDXZSGXNFKFTPKGVXQDGGXXXHXEFP   |     |     |     |     |     |     |     |     |     | 400 |
| Armidale 2008  | MKLASXNWNNDYDPTTEIIPAPLGTDFVVGKIQQGLTQTTXDGSTRGHKAVYTGSAADFAFKLGRVQFATDXTDXBDXZSGXNFKFTPKGVXQDGGSTTHRNEP |     |     |     |     |     |     |     |     |     | 400 |
|                | 410                                                                                                      | 420 | 430 | 440 | 450 | 460 | 470 | 480 | 490 | 500 |     |
| Consensus      | QQWVLPSPYSGRNHNVHLAPAVAPYFPGEQLLFFRSTMPGCSGYPNDDCLLPQEWVQHFYQEAAPQSDVALLRFVNPDTGRVLFECKLHKSGYVTVA        |     |     |     |     |     |     |     |     |     | 500 |
| Hong Kong 2019 | QQWVLPSPYSGRNHNVHLAPAVAPYFPGEQLLFFRSTMPGCSGYPNDDCLLPQEWVQHFYQEAAPQSDVALLRFVNPDTGRVLFECKLHKSGYVTVA        |     |     |     |     |     |     |     |     |     | 500 |
| Armidale 2008  | QQWVLPSPYSGRNHNVHLAPAVAPYFPGEQLLFFRSTMPGCSGYPNDDCLLPQEWVQHFYQEAAPQSDVALLRFVNPDTGRVLFECKLHKSGYVTVA        |     |     |     |     |     |     |     |     |     | 500 |
|                | 510                                                                                                      | 520 | 530 | 540 |     |     |     |     |     |     |     |
| Consensus      | HTGXHDLXIPPNGYFRFDSWVNQFYTLAPMGNGTGRRRAL*                                                                |     |     |     |     |     |     |     |     |     | 541 |
| Hong Kong 2019 | HTGXHDLXIPPNGYFRFDSWVNQFYTLAPMGNGTGRRRAL*                                                                |     |     |     |     |     |     |     |     |     | 541 |
| Armidale 2008  | HTGXHDLXIPPNGYFRFDSWVNQFYTLAPMGNGTGRRRAL*                                                                |     |     |     |     |     |     |     |     |     | 541 |
