# Supplementary material for: Immune Imprinting Drives Human Norovirus Potential for Global Spread
Source: PubMed Central journal article supplement (PMC9600701; doi:10.1128/mbio.01861-22), 2022-09-14
Supplement: mbio.01861-22-s0007.pdf [file mbio.01861-22-s0007.pdf]

**A**

All Sera

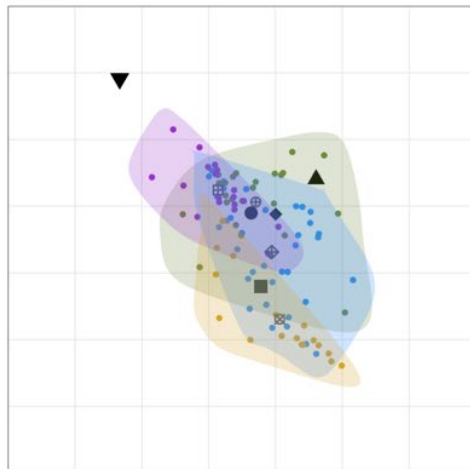

Data

- 2013-2014 Children's Sera
- 2013-2014 Adults' Sera
- 2017-2019 Adults' Sera
- 2018-2019 Children's Sera
- Sydney 2012
- Den\_Haag 2006
- ▲ Den Haag 2017
- ◆ Osaka 2007
- ▼ Hong Kong 2019
- ⊕ Mean 2013-2014 Children's Sera
- ⊕ Mean 2013-2014 Adults' Sera
- ⊕ Mean 2017-2019 Adults' Sera
- ⊕ Mean 2018-2019 Children's Sera

**B**

All Sera

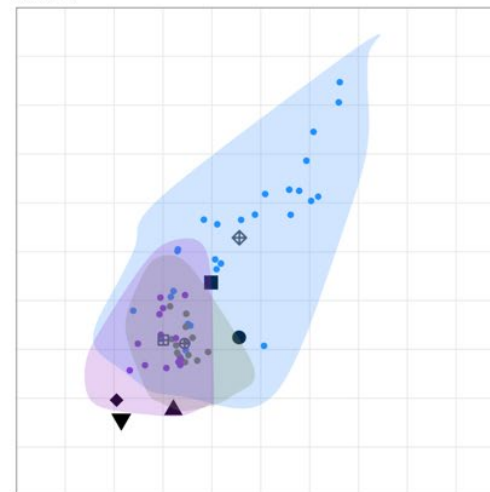

Data

- pre-Farmington Hills Sera
- Den Haag Sera
- Sydney Sera
- US95/95
- Farmington Hills 2002
- ▲ Den Haag 2006
- ◆ New Orleans 2009
- ▼ Sydney 2012
- ⊕ Mean pre-Farmington Hills Sera
- ⊕ Den Haag Sera
- ⊕ Sydney Sera
