# Supplementary material for: Immune Imprinting Drives Human Norovirus Potential for Global Spread
Source: PubMed Central journal article supplement (PMC9600701; doi:10.1128/mbio.01861-22), 2022-09-14

**A**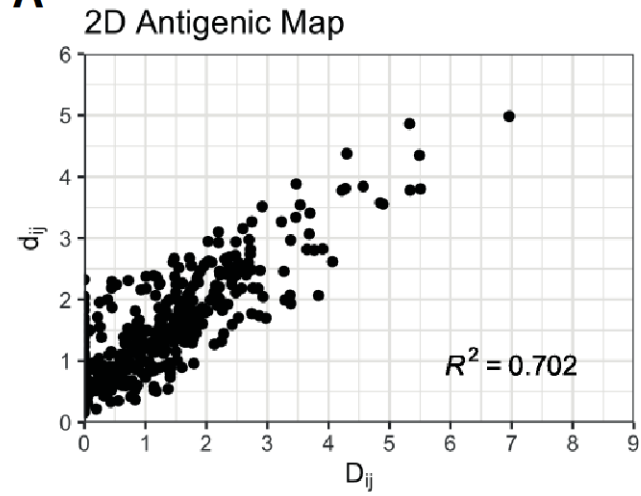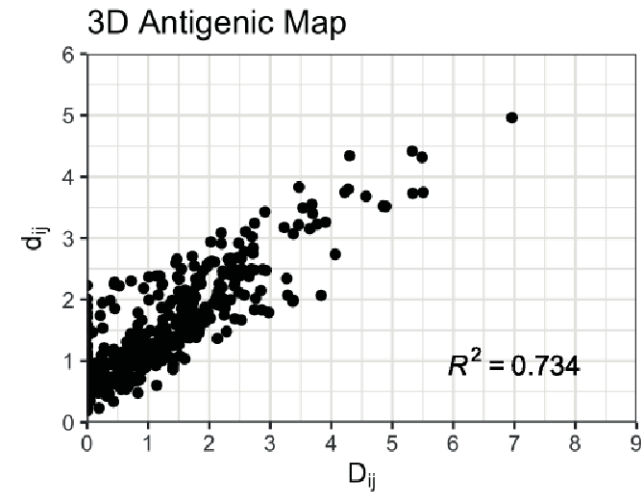**B**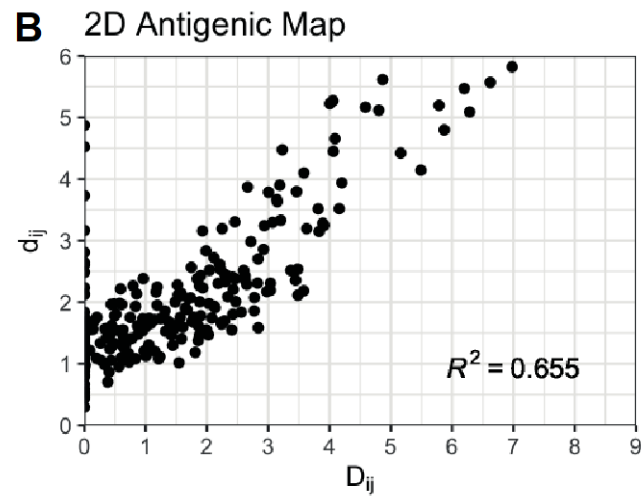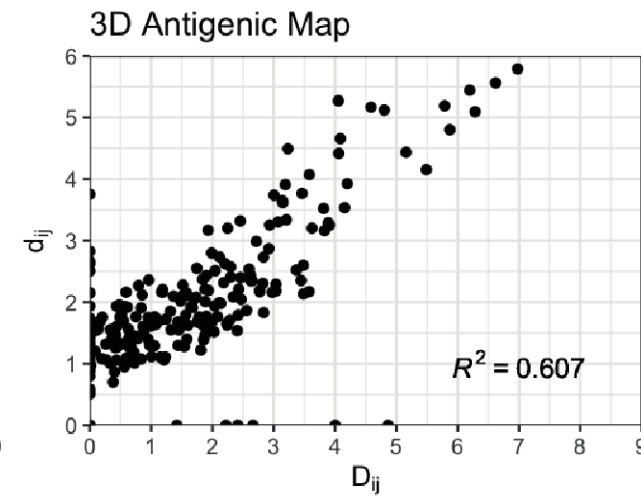

Supplement: mbio.01861-22-s0008.pdf [file mbio.01861-22-s0008.pdf]
