# Supplementary material for: Immune Imprinting Drives Human Norovirus Potential for Global Spread
Source: PubMed Central journal article supplement (PMC9600701; doi:10.1128/mbio.01861-22), 2022-09-14
Supplement: mbio.01861-22-s0009.pdf [file mbio.01861-22-s0009.pdf]

| Outbreak ID | Time<br>MMM-YY | VP1 genotype   | N° of cases | Participant's Age§ |       | State | Source           | Setting                 |
|-------------|----------------|----------------|-------------|--------------------|-------|-------|------------------|-------------------------|
|             |                |                |             | Average            | Range |       |                  |                         |
| 1988-1      | Apr-88         | GII.4          | 51.0        | 66                 | 24-93 | SD    | unknown          | Long-term Care Facility |
| 1988-2      | Apr-88         | GII.4          | n/a         | 31                 | 16-44 | MI    | unknown          | High School             |
| 1995-1      | Sep-95         | GII.4          | n/a         | 89.2               | 83-92 | HI    | unknown          | Long-term Care Facility |
| 1996-1      | Jan-96         | GII.4          | 40.0        | n/a                | n/a   | SC    | Person to person | Hospital                |
| 1997-1      | Mar-97         | GII.4          | 41.0        | 81.5               | 79-84 | PA    | unknown          | Long-term Care Facility |
| 1998-1      | Mar-98         | GII.4          | 125.0       | 20                 | 19-21 | TX    | food             | University              |
| 1999-1      | Dec-99         | GII.4          | 55.0        | n/a                | n/a   | WV    | Person to person | Long-term Care Facility |
| 2006-1      | Oct-06         | GII.4 Den Haag | n/a         | 72.75              | 63-84 | MS    | Person to person | Cruise ship             |
| 2010-1      | May-2010       | GII.4 Den Haag | 76.0        | 77                 | 73-81 | OR    | Person to person | Long-term Care Facility |
| 2011-1      | Apr-2011       | GII.4 Den Haag | 25.0        | 53.5               | 27-80 | OR    | Person to person | Long-term Care Facility |
| 2011-2      | Sep-2011       | GII.4 Den Haag | 47.0        | 79                 | 64-94 | OR    | Person to person | Long-term Care Facility |
| 2012-1      | Nov-2012       | GII.4 Sydney   | 12.0        | 54.75              | 23-76 | OR    | Unknown          | Long-term Care Facility |
| 2012-2      | Dec-2012       | GII.4 Sydney   | 8.0         | 65                 | 65    | OR    | unknown          | Long-term Care Facility |
| 2014-1      | Mar-2014       | GII.4 Sydney   | n/a         | 45                 | 45    | OR    | Person to person | Long-term Care Facility |
| 2014-2      | Mar-2014       | GII.4 Sydney   | n/a         | 49.4               | 23-76 | OR    | Person to person | Long-term Care Facility |
| 2014-3      | Apr-2014       | GII.4 Sydney   | 19.0        | 37.3               | 25-46 | OR    | unknown          | Long-term Care Facility |

§ For those included in this study
