# Supplementary material for: Immune Imprinting Drives Human Norovirus Potential for Global Spread
Source: PubMed Central journal article supplement (PMC9600701; doi:10.1128/mbio.01861-22), 2022-09-14
Supplement: mbio.01861-22-s0010.pdf [file mbio.01861-22-s0010.pdf]

| <b>Variant</b> | <b>GenBank #</b> |
|----------------|------------------|
|----------------|------------------|

**Population Sera**

|                |            |
|----------------|------------|
| Den Haag 2006  | AFU92665.1 |
| Den Haag 2017  | UBX38815.1 |
| Osaka 2007     | ACX31885.1 |
| Hong Kong 2019 | QEL43936.1 |
| Sydney 2012    | AGJ52172.1 |

**Outbreak Sera**

|                       |            |
|-----------------------|------------|
| Camberwell 1987       | AAK50355.1 |
| GII.4 US 95/96        | AFJ04707.1 |
| Farmington Hills 2002 | AFJ04708.1 |
| Den Haag 2006         | AFJ04709.1 |
| Sydney 2012           | AFV08795.1 |
